# Supplementary material
Source: MDPI journal article supplement (https://www.mdpi.com/2072-4292/13/17/3482)
Supplement: s1 [file s1 › remotesensing-1334173-supplementary.pdf]

## Supplementary

**Supplementary Table S1.** Wheat genotypes for 2018 experiment sites [15,48,59]

| <b>Name</b>     | <b>Breeder</b> | <b>Grade</b>     | <b>Target Australian region</b>                            |
|-----------------|----------------|------------------|------------------------------------------------------------|
| <b>Corack</b>   | AGT*           | APW <sup>1</sup> | WA, relatively drought tolerant                            |
| <b>Emu Rock</b> | Inter-grain**  | AH <sup>2</sup>  | WA                                                         |
| <b>Flanker</b>  | LPB***         | APH <sup>3</sup> | NSW and Qld, some resistance to stripe, stem and leaf rust |
| <b>Gregory</b>  | EGA****        | APH <sup>3</sup> | NSW and Qld                                                |
| <b>Gladus</b>   | AGT*           | AH <sup>2</sup>  |                                                            |
| <b>Hartog</b>   | DAFQ*****      | APH <sup>3</sup> | NSW and Qld                                                |
| <b>Lancer</b>   | LPB***         | APH <sup>3</sup> | NSW and Qld                                                |
| <b>Mace</b>     | AGT*           | AH <sup>2</sup>  | NSW and Qld, less susceptible to downgrading               |
| <b>Mitch</b>    | AGT*           | AH <sup>2</sup>  | NSW and Qld                                                |
| <b>Magenta</b>  | Intergrain**   | APW <sup>1</sup> | WA                                                         |
| <b>Janz</b>     | DAFQ*****      | APH <sup>3</sup> | eastern Australia                                          |
| <b>Scout</b>    | LPB***         | APW <sup>1</sup> | Victoria and SA                                            |
| <b>Trojan</b>   | LPB***         | APW <sup>1</sup> | South and WA                                               |
| <b>Wallup</b>   | AGT*           | APH <sup>3</sup> | WA                                                         |
| <b>Sunco</b>    | AGT*           | APH <sup>3</sup> | NSW and Qld                                                |
| <b>Bremer</b>   | AGT*           | AH <sup>2</sup>  | WA                                                         |
| <b>Condo</b>    | AGT*           | AH <sup>2</sup>  | NSW and Victoria                                           |
| <b>Elmore</b>   | AGT*           | AH <sup>2</sup>  | NSW and Qld                                                |

\*Australian Grain Technologies, \*\*International Maize and Wheat Improvement Centre (CIMMYT), \*\*Commonwealth Scientific and Industrial Research Organisation (CSIRO), \*\*International Centre for Agricultural Research in Dry Areas (ICARDA), \*\*\*Long Reach Plant Breeders, \*\*\*\*Enterprise Grains Australia (EGA), \*\*\*\*\*Queensland Department of Agriculture and Fisheries (DAFQ). <sup>1</sup>Australian Premium White, <sup>2</sup>Australian Hard, <sup>3</sup>Australian Prime Hard.

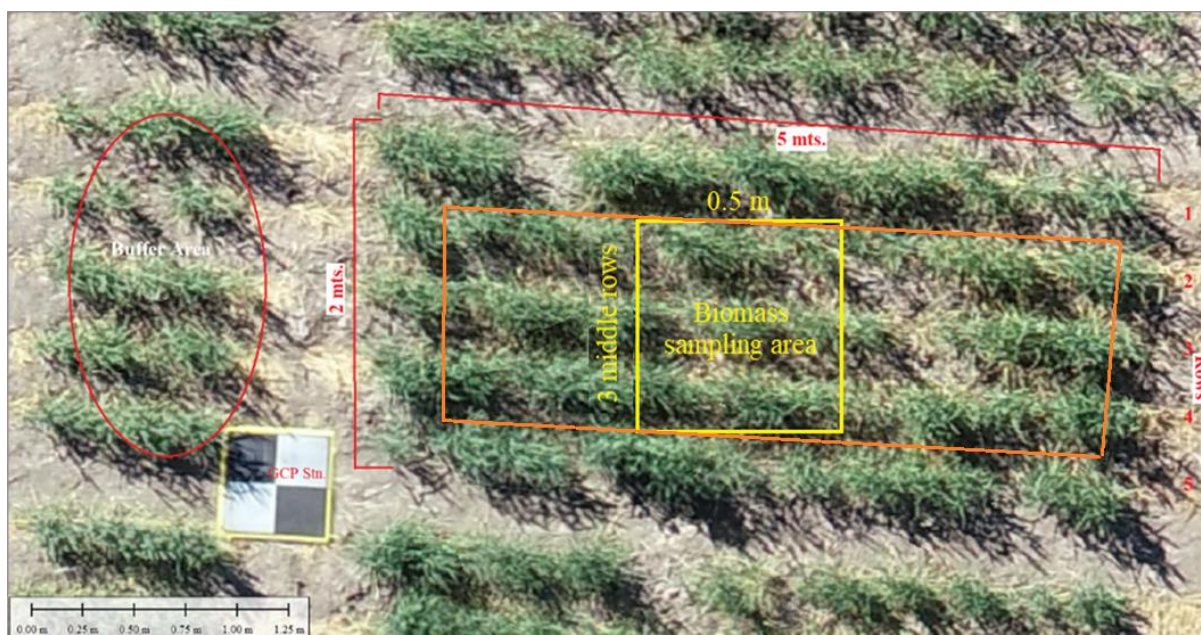

**Supplementary Figure S1.** Drone image of a representative plot illustrating a typical destructive biomass sampling area ('yellow' square box indicating  $0.5 \times 3$  middle rows area) and plant reflectance measurements area using GreenSeeker and ASD FieldSpec ('orange' rectangular box including 3 middle rows) within the plot. One of the propeller markers for GPS location calibration is shown in the lower left hand of the image [15].

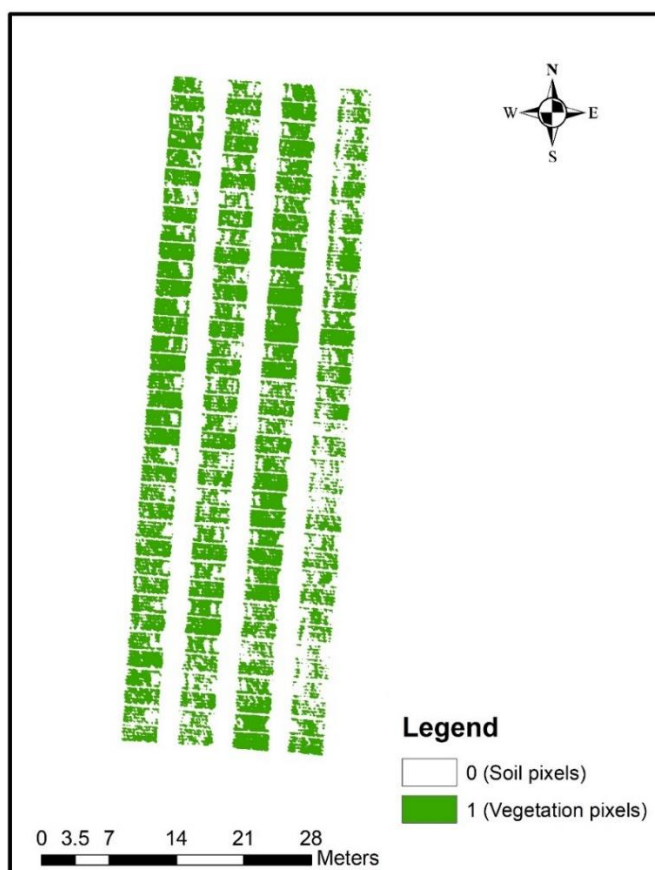

**Supplementary Figure S2.** A representative site image showing classified and separated soil and canopy pixels using Otsu's algorithm

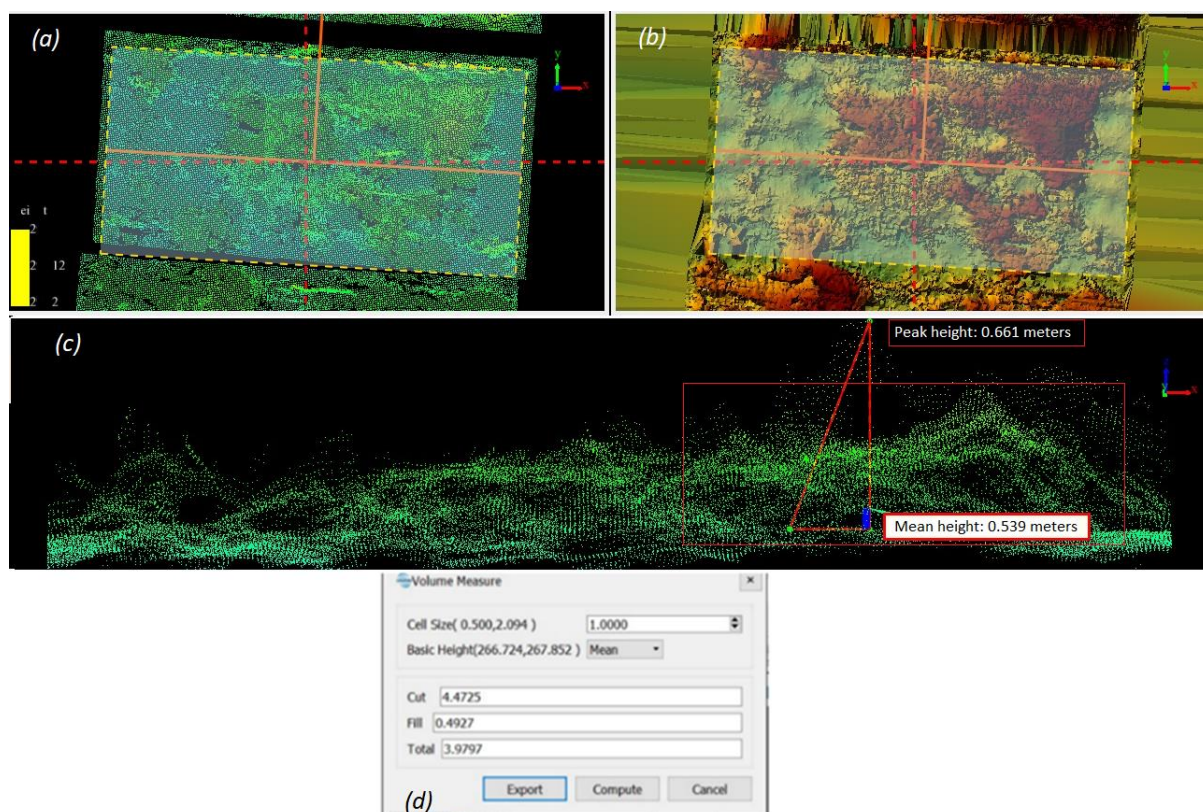

**Supplementary Figure S3.** A representation of crop height extraction method using RGB-3D point cloud techniques, (a) aerial view of the plot-wise 3D point clouds, (b) triangulated irregular network (TIN), (c) cross-sectional profile of a single plot for measurement of crop height, (d) crop volume measurement.

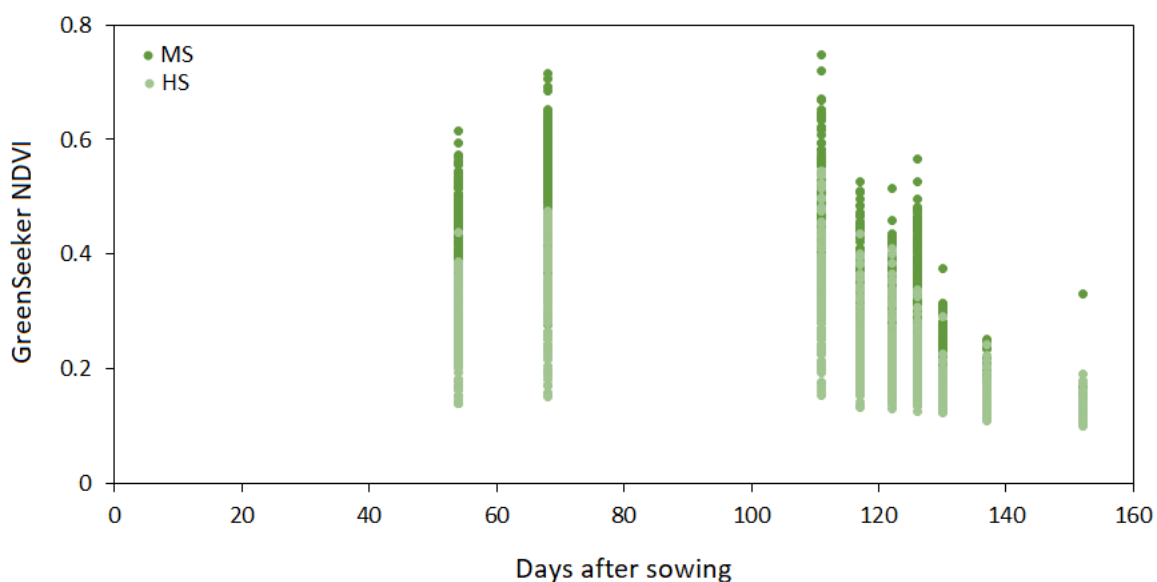

**Supplementary Figure S4.** Seasonal GreenSeeker NDVI values of the moderately sodic (MS) and the highly sodic (HS) site.

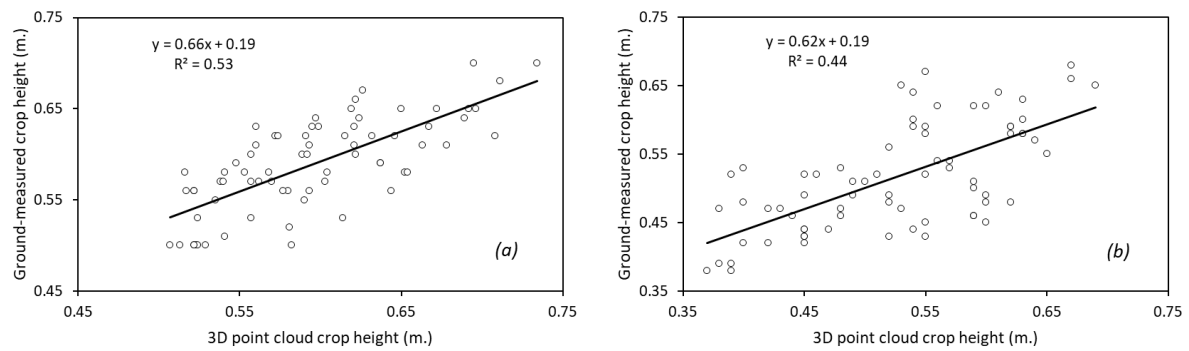

**Supplementary Figure S5.** Correlation between ground-measured crop height and 3D point cloud derived crop height; **(a)** moderately sodic site, **(b)** highly sodic site;  $n = 72$ .

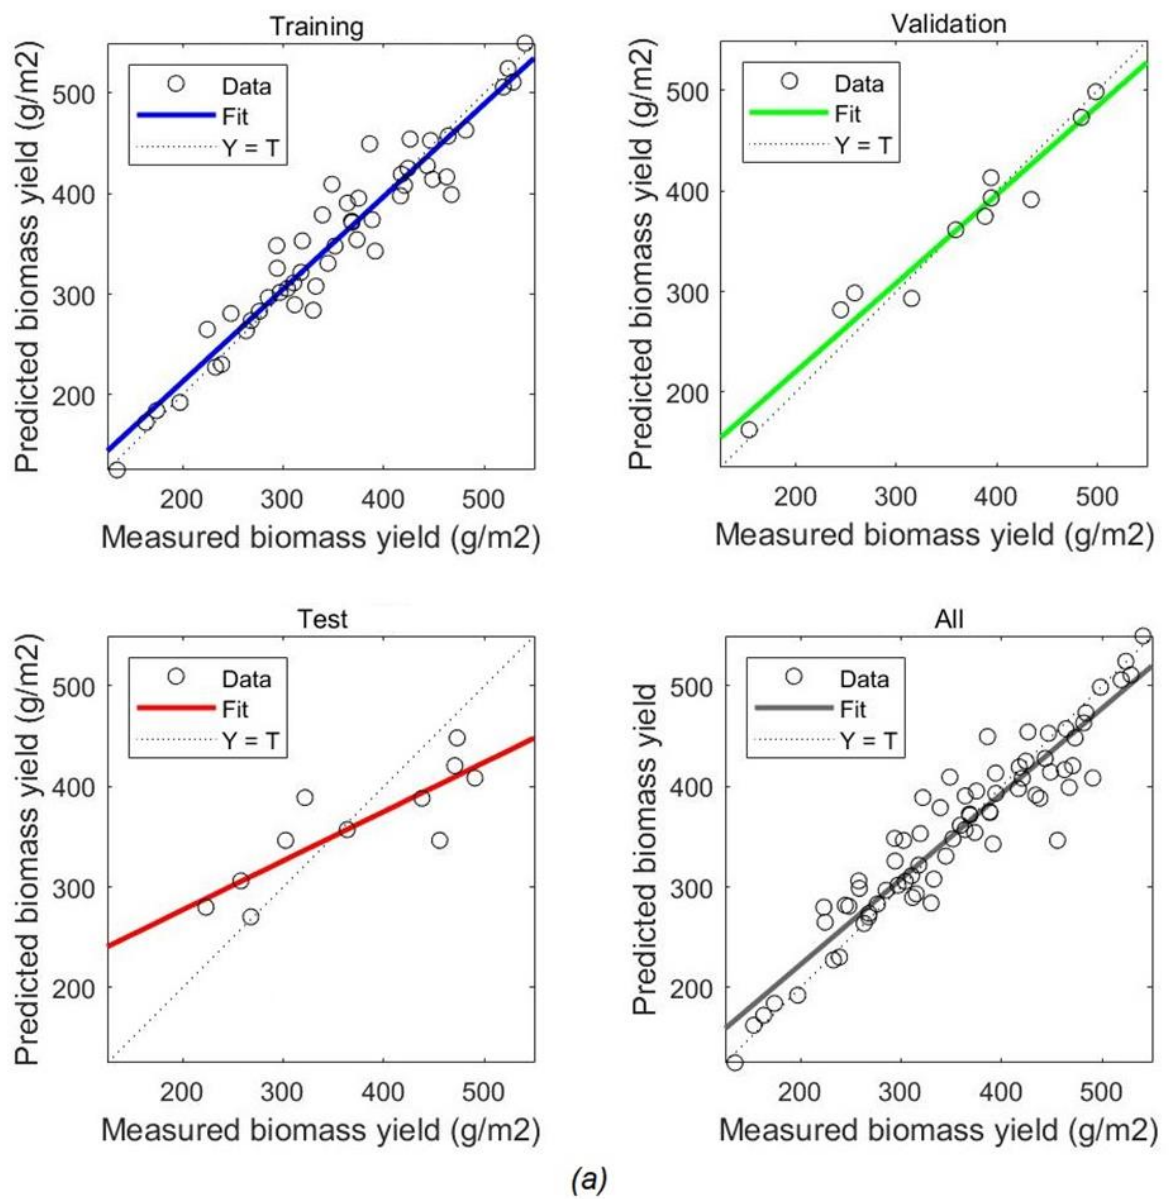

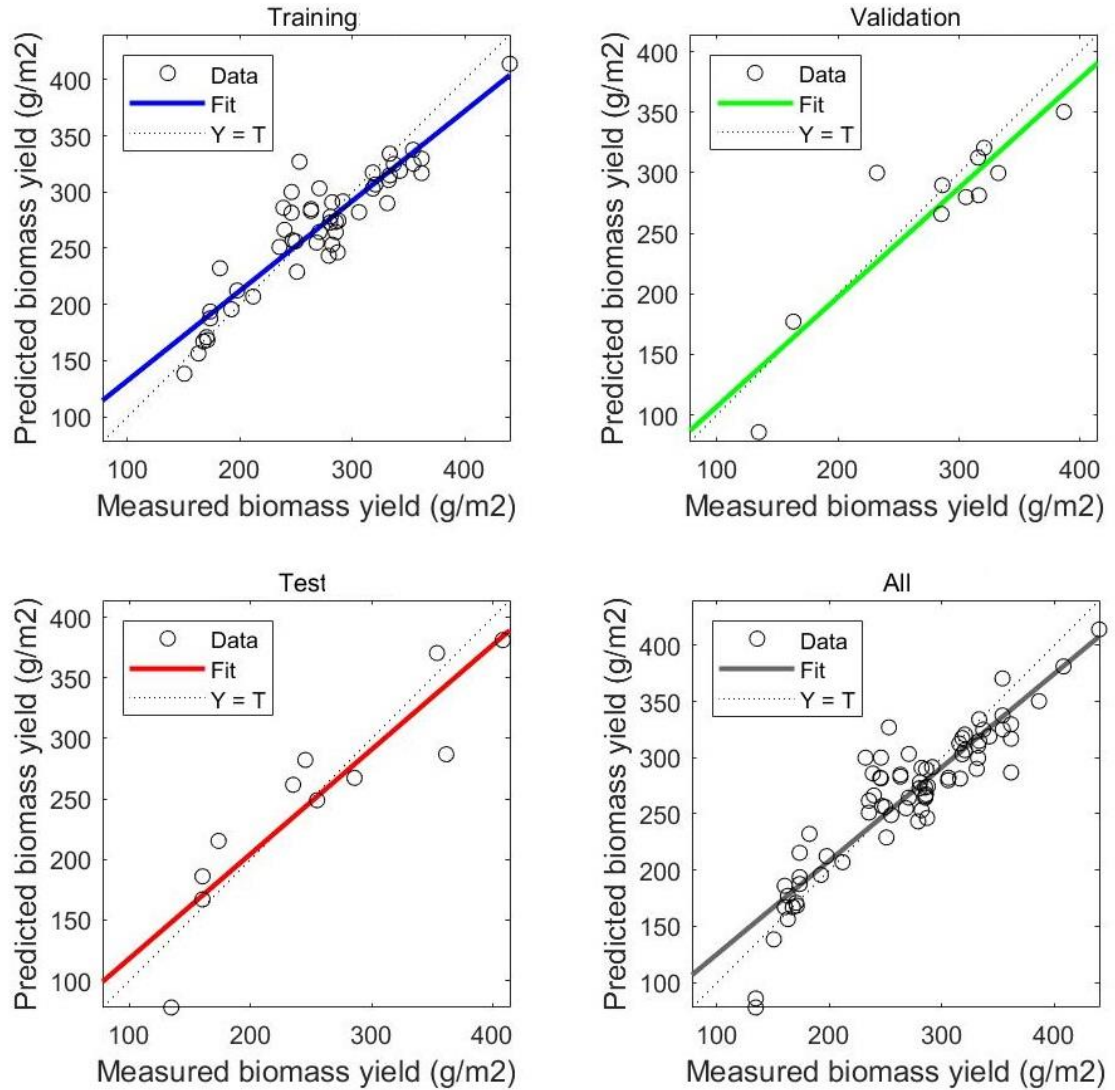

(b)

**Supplementary Figure S6.** Cross-validation of correlation between ground-measured biomass yield and ANN predicted biomass yield as a function of UAV-multispectral VIs and 3D point cloud crop height; (a) moderately sodic (MS) and (b) highly sodic site (HS);  $n = 72$

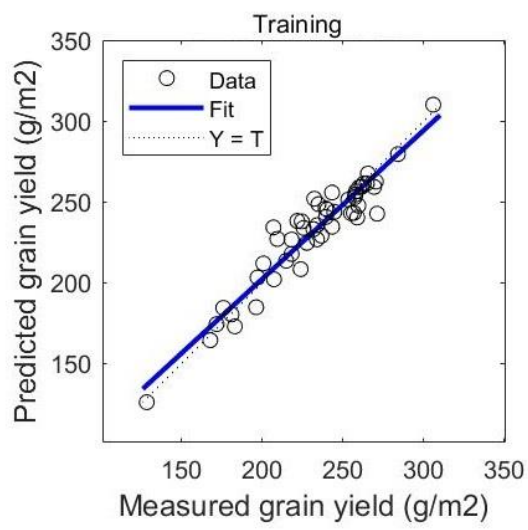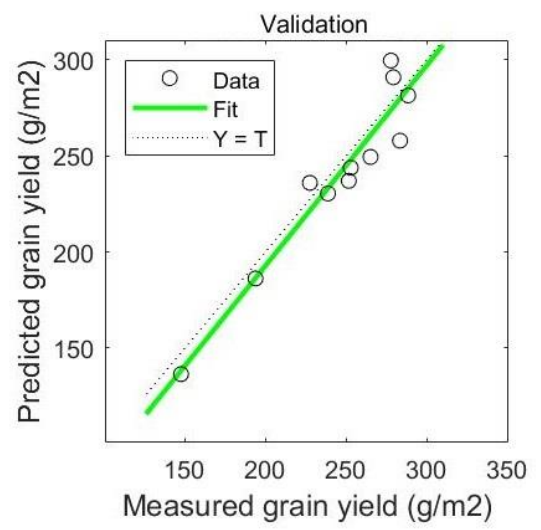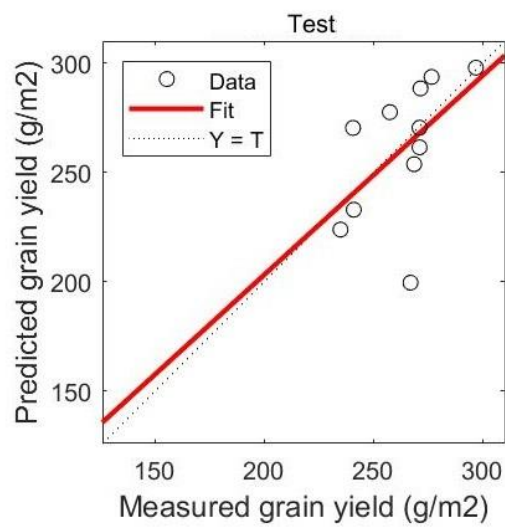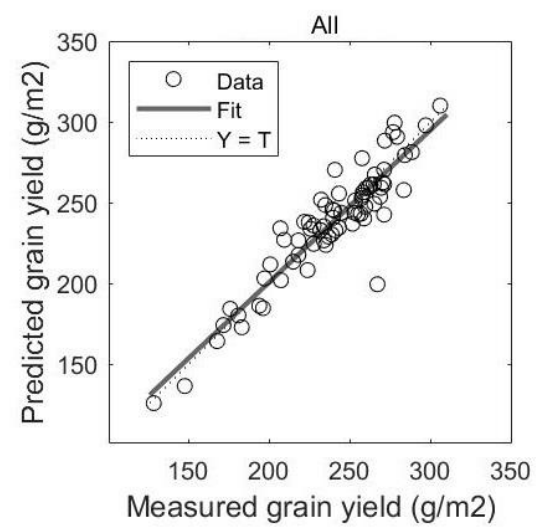

(a)

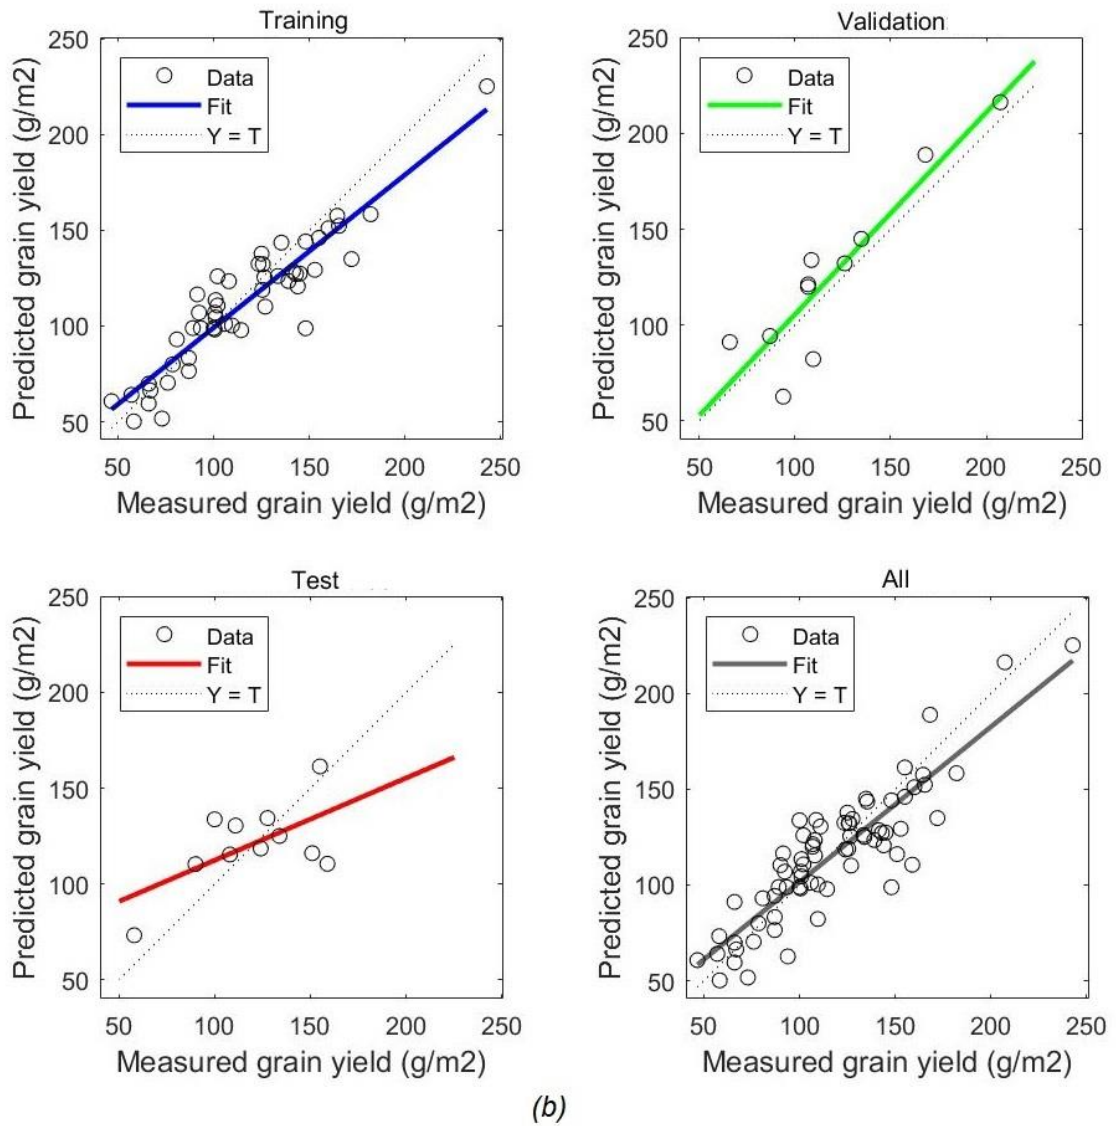

**Supplementary Figure S7.** Cross-validation of correlation between ground-measured grain yield and ANN predicted grain yield as a function of UAV-multispectral VIs and 3D point cloud crop height; (a) moderately sodic (MS) and (b) highly sodic site (HS);  $n=72$
